# Supplementary material
Source: PubMed Central journal article supplement (PMC3805246)

**A.**

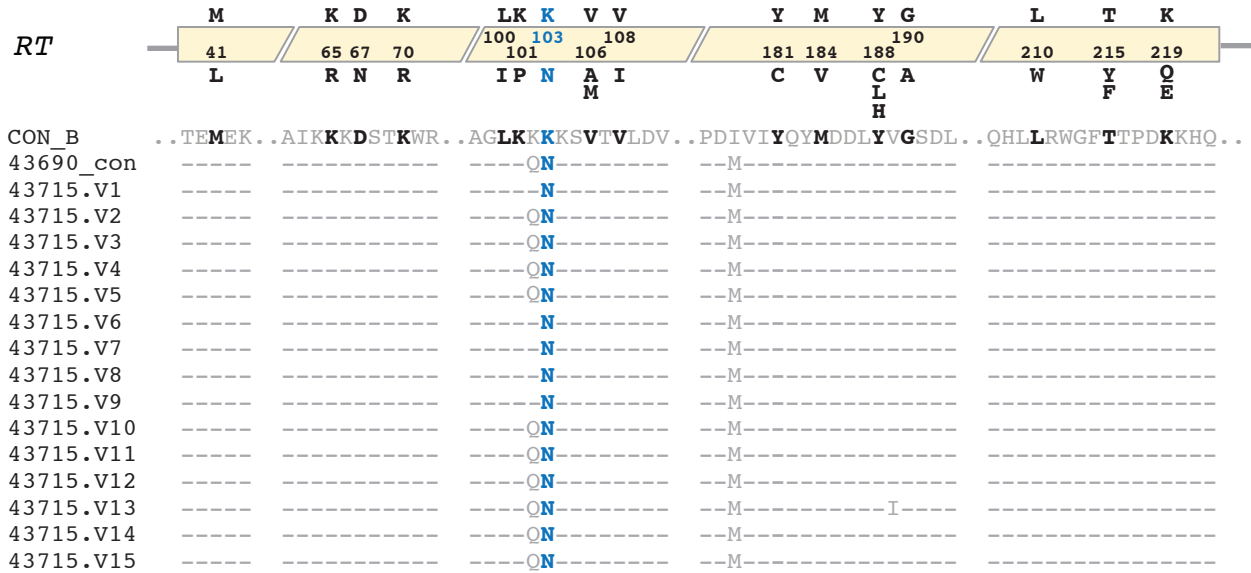

**B.**

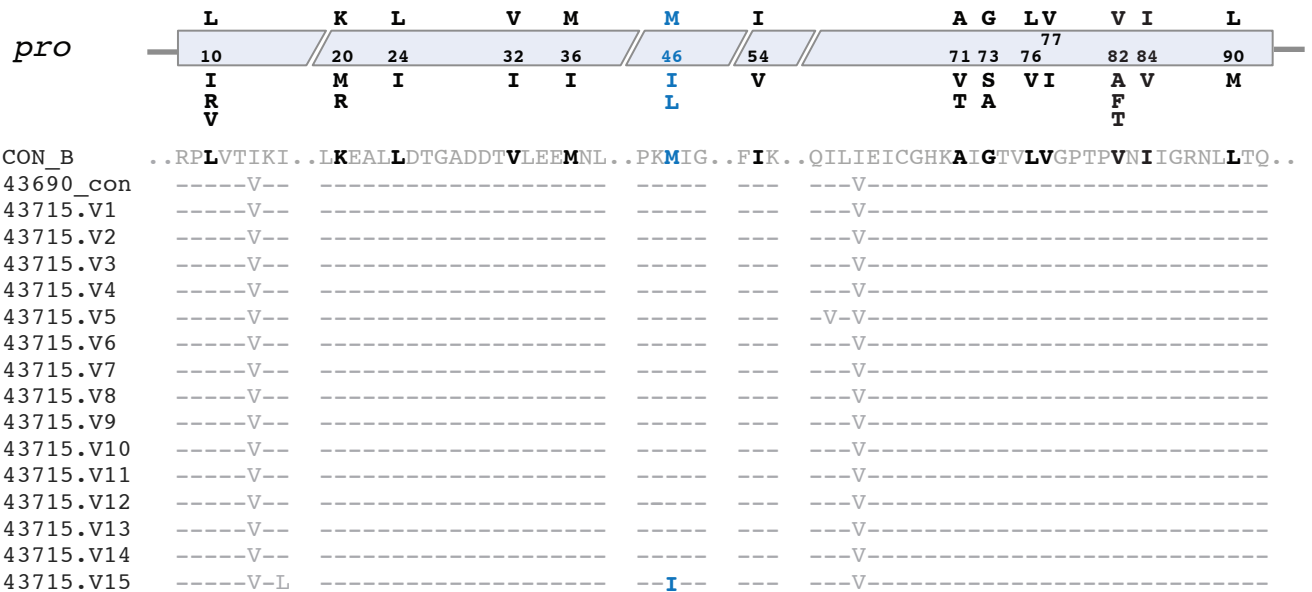

**Figure S1.**

Supplement: supp_jit485_jit485supp_fig.pdf [file supp_jit485_jit485supp_fig.pdf]
